# Supplementary material for: Content, Quality, and Assessment Tools of Physician-Rating Websites in 12 Countries: Quantitative Analysis
Source: PubMed Central journal article supplement (PMC6024097; doi:10.2196/jmir.9105), 2018-06-14
Supplement: jmir_v20i6e212_app1.pdf [file jmir_v20i6e212_app1.pdf]

Appendix 1. Quality criteria fulfillment levels.

| <b>Quality dimension</b>                                               |                                                                                                                                    | <b>Fulfilled,<br/>N (%)</b> |
|------------------------------------------------------------------------|------------------------------------------------------------------------------------------------------------------------------------|-----------------------------|
| <b>Transparent, accurate, and neutral content from evident sources</b> |                                                                                                                                    |                             |
|                                                                        | The type of website owner is identifiable                                                                                          | 132 (92.3)                  |
|                                                                        | Location search criteria (location, city, and community) are present                                                               | 131 (91.6)                  |
|                                                                        | The website's general terms and conditions are present                                                                             | 128 (89.5)                  |
|                                                                        | The manager or owner of the website is listed                                                                                      | 122 (85.3)                  |
|                                                                        | The website transparently communicates from where the physician profile information was extracted                                  | 106 (74.1)                  |
|                                                                        | Users need to register or provide information (personal or impersonal) to submit a review                                          | 103 (72)                    |
|                                                                        | The email address of the website manager is listed                                                                                 | 103 (72)                    |
|                                                                        | It is clearly visible based on which criteria or rules physicians are listed in the search results page                            | 58 (40.6)                   |
|                                                                        | Review computation is transparent (more details about the computation process and the items building average scores can be viewed) | 44 (30.8)                   |
|                                                                        | There are no physician advertisements present                                                                                      | 56 (39.2)                   |
|                                                                        | The website does not sell upgrade profile enhancements to physicians                                                               | 42 (29.4)                   |
|                                                                        | The website transparently separates advertisements and website services or content                                                 | 35 (24.5)                   |
|                                                                        | Physicians' medical board registration number is listed                                                                            | 17 (11.9)                   |
|                                                                        | The website states when a physician profile was last updated                                                                       | 16 (11.2)                   |
|                                                                        | The website is HON Code certified (label present)                                                                                  | 8 (5.6)                     |

|                                                                                             |                                                                                                                           |            |
|---------------------------------------------------------------------------------------------|---------------------------------------------------------------------------------------------------------------------------|------------|
| <b>Respects the freedom of speech and privacy of physician and health care consumer</b>     |                                                                                                                           |            |
|                                                                                             | Reviews are anonymously or semi-anonymously published to protect the user                                                 | 125 (87.4) |
|                                                                                             | Users are instructed on appropriate behavior on the physician-reported websites (PRWs)                                    | 82 (57.3)  |
|                                                                                             | Physicians can request partial or full profile or information withdrawal                                                  | 63 (44.1)  |
|                                                                                             | User data is not transmitted to third parties                                                                             | 38 (26.6)  |
|                                                                                             | Physicians can reply to patients' reviews                                                                                 | 36 (25.2)  |
|                                                                                             | All physician profile changes/ modifications are free for the listed physicians                                           | 31 (21.7)  |
|                                                                                             | Cookies do not automatically collect data about the user                                                                  | 3 (2.1)    |
|                                                                                             | User can identify if the physician's approved or claimed his or her own profile                                           | 14 (9.8)   |
|                                                                                             | The rating website clearly states that reviews posted on that website are not shared with or forwarded to other platforms | 7 (4.9)    |
|                                                                                             | User information that was collected by the website is not processed or analyzed by the website provider                   | 0 (0)      |
| <b>Mechanisms to ensure accuracy and appropriateness of information content and reviews</b> |                                                                                                                           |            |
|                                                                                             | The website limits the number of evaluations by the same user                                                             | 107 (74.8) |
|                                                                                             | A contact email address or button on the physician's profile page is available to report misuse of the website            | 106 (74.1) |
|                                                                                             | Physicians are protected in case users post defaming criticism                                                            | 105 (73.4) |
|                                                                                             | The website has a feature to identify machine insertion of reviews                                                        | 104 (72.7) |

|                                 |                                                                                                                                     |            |
|---------------------------------|-------------------------------------------------------------------------------------------------------------------------------------|------------|
|                                 | User are asked to submit information about themselves before they can post a review                                                 | 69 (48.3)  |
|                                 | Reviews are systematically checked by a website administrator before publication                                                    | 44 (30.8)  |
|                                 | User instruction on appropriate behavior on the PRWs (present on the review page)                                                   | 38 (26.6)  |
|                                 | Physicians are notified before a new post or review goes online                                                                     | 20 (14)    |
|                                 | Minimum number of reviews (more than one) required for profiles to go online                                                        | 9 (6.3)    |
|                                 | Reviews expire after a certain time period                                                                                          | 9 (6.3)    |
|                                 | There is a warning message present on the written review page indicating that reviews are subjective and should be viewed with care | 8 (5.6)    |
|                                 | Physicians are notified when their profile goes online                                                                              | 6 (4.2)    |
| <b>Easy to use and navigate</b> |                                                                                                                                     |            |
|                                 | Search criteria “specialization” is present                                                                                         | 133 (93)   |
|                                 | Search criteria “name of the physician” is present                                                                                  | 100 (69.9) |
|                                 | Providers close by are featured one click away from the profile the user is viewing                                                 | 50 (35)    |
|                                 | Providers of the same specialization are featured are one click away from the profile the user is viewing                           | 54 (33.7)  |
|                                 | There are filters available that help users limit physician choices based on their preferences                                      | 48 (33.6)  |
|                                 | Search criteria “patient’s medical condition” is present                                                                            | 41 (28.7)  |
|                                 | Search criteria “sociodemographic criteria” is present                                                                              | 16 (11.2)  |
|                                 | Search criteria “health insurances the physician accepts” is present                                                                | 15 (10.5)  |
|                                 | Users can compare two or more doctors side by side                                                                                  | 11 (7.7)   |
|                                 | The websites provides user aids for people with handicaps                                                                           | 1 (0.7)    |
